# Supplementary material for: Combining participatory and socioeconomic approaches to map fishing effort in small-scale fisheries
Source: PLoS One. 2017 May 9;12(5):e0176862. doi: 10.1371/journal.pone.0176862 (PMC5423602; doi:10.1371/journal.pone.0176862)
Supplement: S1 Table — High value: high dependency; low value: low dependency. District IDs can be found at http://ispf.pf. (XLSX) [file pone.0176862.s001.xlsx]

## Sheet: data
district_ID	resource_dependency
291001010	0.112542
291001020	0.129327
291001030	0.105887
291001040	0.0726516
291001050	0.0179431
291001060	0.0638509
291001070	0.141317
291001080	0.103874
291001090	0.124857
291001100	0.080614
291001110	0.118248
291001120	0.132098
291001130	0.12849
292001140	0.119992
292001150	0.145014
292001160	0.114414
292001170	0.156414
292001180	0.120205
292001190	0.139271
292001200	0.114006
292001210	0.111769
292001220	0.120696
292001230	0.125115
292001240	0.10831
292001250	0.127391
292001260	0.0964237
292001270	0.118489
292001271	0.115741
292001280	0.101087
292001290	0.149555
294001420	0.146879
294001430	0.142781
294001440	0.128571
294001450	0.0804749
294001460	0.0792591
294001470	0.0564738
294001480	0.0599594
294001490	0.0920686
294001500	0.156453
294001510	0.149202
294001520	0.104214
294001530	0.13853
294001540	0.106998
294001550	0.118499
294001560	0.129424
294001570	0.117828
294001580	0.0714835
294001590	0.13149
295001300	0.16103
295001310	0.135847
295001320	0.0941375
295001330	0.0563811
295001340	0.108822
295001350	0.0940924
295001360	0.100104
295001370	0.25
295001380	0.137574
295001390	0.137755
295001400	0.142863
295001410	0.140484
296001600	0.141149
296001610	0.0654161
296001620	0.142882
296001630	0
296001640	0.151521
296001650	0.120393
296001660	0.018469
296001670	0.0493827
296001680	0.0576395
